# Supplementary material
Source: PubMed Central journal article supplement (PMC3606063)

**Fig S1**

Gate: CD56+

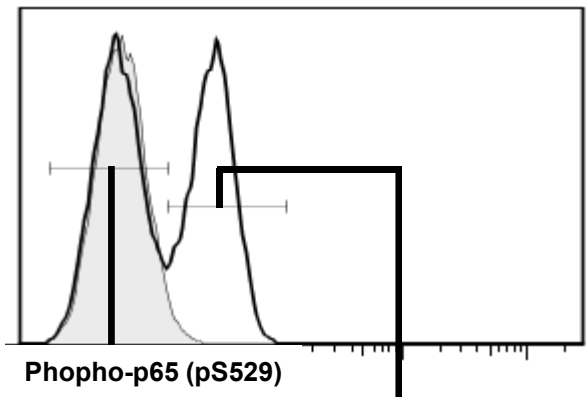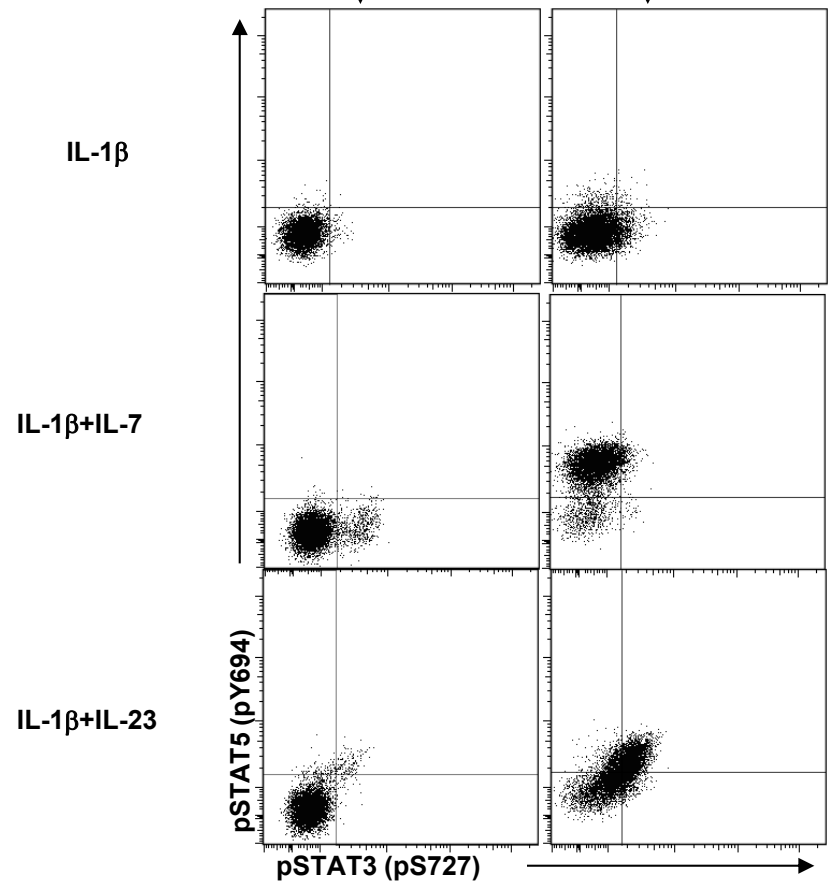

Supplement: supp_blood-2012-07-440099_blood-2012-07-440099-1.pdf [file supp_blood-2012-07-440099_blood-2012-07-440099-1.pdf]
